# Supplementary material
Source: Springer Nature journal article supplement (https://www.springermedizin.de/resource/supplementary/12974_2011_457_MOESM4_ESM.pdf/9601354)

□ C/EBP $\beta$  +/+    ■ C/EBP $\beta$  -/-

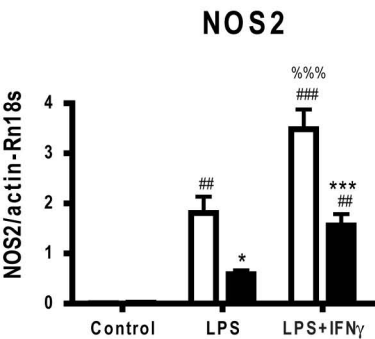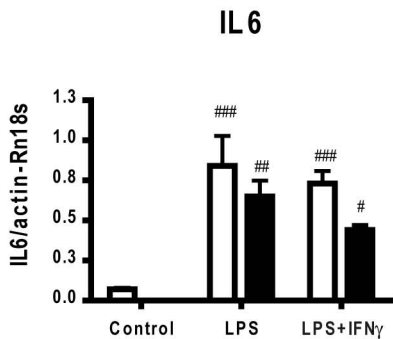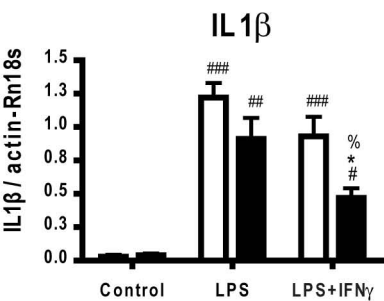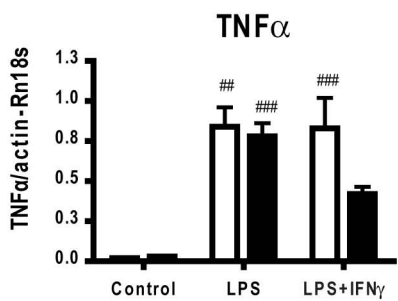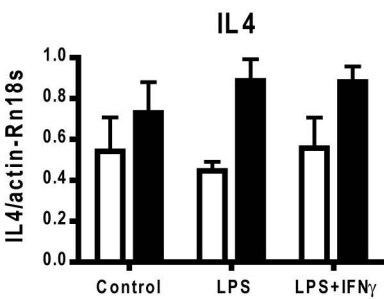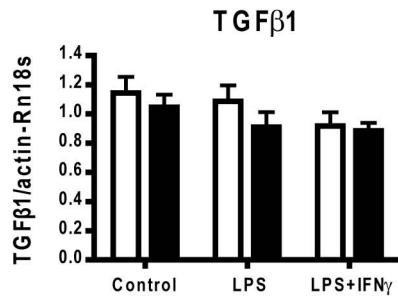

Supplement: MOESM4 [file 9601354]
